# Supplementary material for: Investigation of biomarkers for discriminating breast cancer cell lines from normal mammary cell lines based on VOCs analysis and metabolomics
Source: Royal Society of Chemistry journal article supplement (doi:10.1039/c6ra03238a), 2016-01-01

## Supplementary information

### Investigation of biomarkers for discriminating breast cancer cell lines from normal mammary cell line based on VOCs analysis and metabolomics

Yanping Huang<sup>a,b</sup>, Yu Li<sup>b</sup>, Zewei Luo<sup>b</sup>, Yixiang Duan<sup>b\*</sup>

Fig S1. Typical GC-MS chromatographs of MDA-MB-231 (a) and CCD-1095Sk (b), highlighting the peaks of the 4 potential biomarkers. 1: p-xylene; 2:cyclohexanol; 3: 2-ethylhexanol; 4: 2, 4-dimethylbenzaldehyde

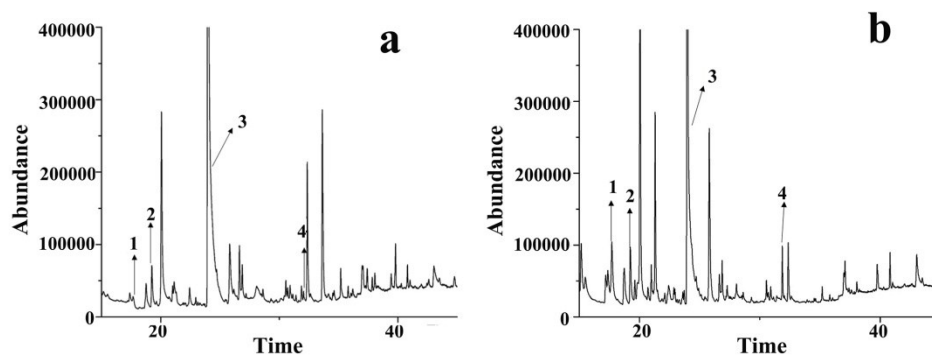

Supplement: c6ra03238a1.pdf [file c6ra03238a1.pdf]
